# Supplementary material for: Quantitative Depth Profiling Using Online-Laser Ablation of Solid Samples in Liquid (LASIL) to Investigate the Oxidation Behavior of Transition Metal Borides
Source: MDPI journal article supplement (doi:10.3390/molecules27103221), 2022-05-18
Supplement: s1 [file s1]

**Table S1.** ICP-OES parameters for liquid reference measurements.

|                                       |                                                   |                                                    |
|---------------------------------------|---------------------------------------------------|----------------------------------------------------|
| <b>RF-Power</b>                       |                                                   | <b>1300 W</b>                                      |
| <b>Radial observation height</b>      |                                                   | <b>14 mm</b>                                       |
| <b>Cooling gas flow (Ar)</b>          |                                                   | <b>12 L/min</b>                                    |
| <b>Nebulizer gas flow (Ar)</b>        |                                                   | <b>0.65 L/min</b>                                  |
| <b>Auxiliary gas flow (Ar)</b>        |                                                   | <b>0.4 L/min</b>                                   |
| <b>Integration time per replicate</b> |                                                   | <b>8 s</b>                                         |
| <b>Replicates per sample</b>          |                                                   | <b>3</b>                                           |
| <b>Purge pump flow rate</b>           |                                                   | <b>1.6 mL/min</b>                                  |
| <b>Analysis pump flow rate</b>        |                                                   | <b>0.8 mL/min</b>                                  |
| <b>Measured Elements</b>              | <b>Emission line used for quantification [nm]</b> | <b>Emission line used for quality control [nm]</b> |
| <b>B</b>                              | 249.773 (I)                                       | 208.893 (I)                                        |
| <b>Si</b>                             | 250.690 (I)                                       | 288.158(I)                                         |
| <b>Cr</b>                             | 283.563(II)                                       | 284.325(II)                                        |

The liquid LOD was calculated by  $\frac{3 \cdot \sigma}{k}$

Whereas k is the slope of the regression line, and  $\sigma$  is the standard derivation of the blank.

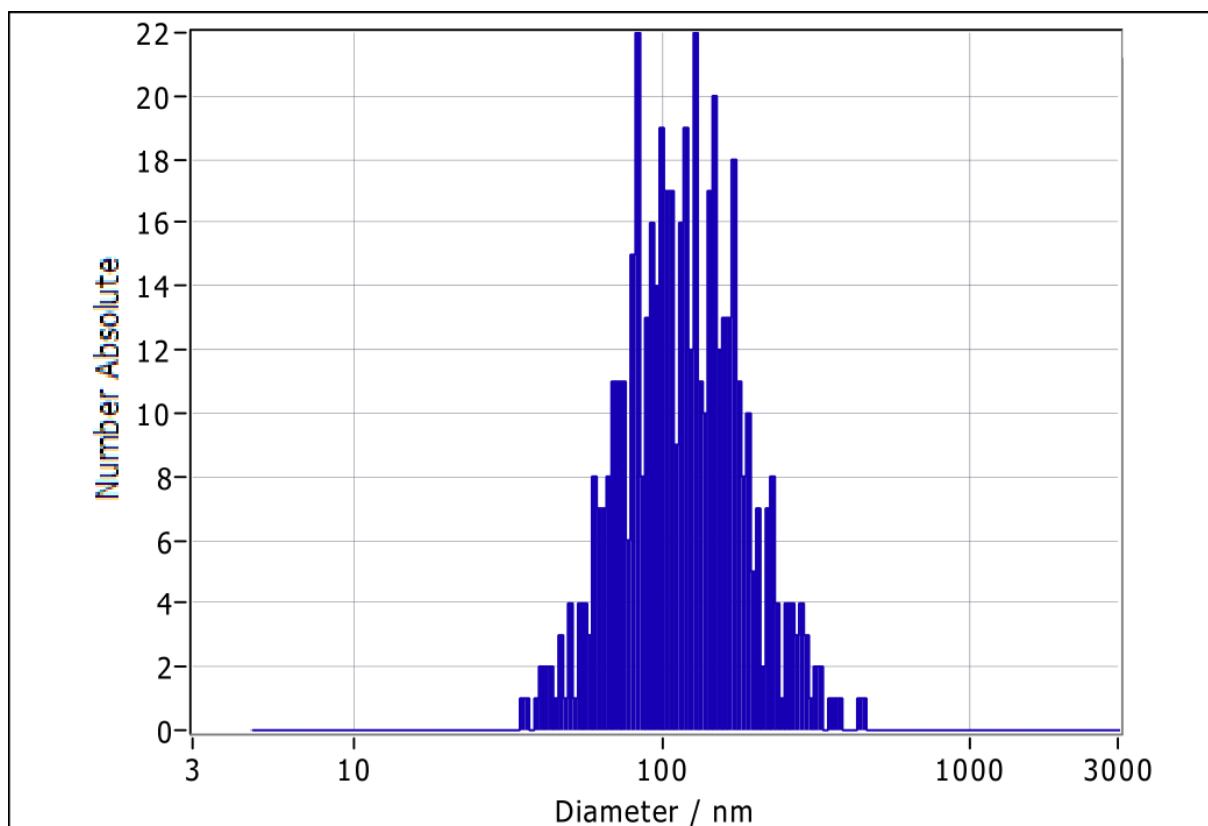

**Figure S1.** Particle size distribution measurement of the particles generated by online-LASIL
